# Supplementary material for: Cross–Cell-Line Conservation-Resolved Interactions Reveal a Stepwise Cascade of CTCF Loop Formation
Source: Research Square preprint supplement (doi:10.21203/rs.3.rs-8752985/v1), 2026-02-24
Supplement: Supplementary file 1 [file f07ae494fdacf130b3894005.docx]

Supplementary Table S1. ENCODE accession codes for all chromatin features examined in this study, including 11 histone modifications and the transcription factors CTCF and RAD21 used in our analyses.

| chromatin features | Cell lines | | | | | | | |
| --- | --- | --- | --- | --- | --- | --- | --- | --- |
| GM12878 | H1 | HCT116 | HepG2 | HepG2 | K562 | MCF7 | SK-N-SH |
| CTCF | ENCSR000DZN | ENCSR000AMF | ENCSR000DTO | ENCSR000BIE | ENCSR000BIE | ENCSR000EGM | ENCSR000AHD | ENCSR000EIC |
| RAD21 | ENCSR000EAC | ENCSR000ECE | ENCSR000BSB | ENCSR000EEG | ENCSR000EEG | ENCSR000BKV | ENCSR000BTQ | ENCSR000EHX |
| H2AFZ | ENCSR000AOV | ENCSR000APX | ENCSR227XNT | ENCSR000AOK | ENCSR000AOK | ENCSR000APC | ENCSR057MWG | ENCSR366QMB |
| H3K4me1 | ENCSR000AKF | ENCSR000ANA | ENCSR161MXP | ENCSR000APV | ENCSR000APV | ENCSR000AKS | ENCSR493NBY | ENCSR661BMA |
| H3K4me2 | ENCSR000AKG | ENCSR000ANC | ENCSR794ULT | ENCSR000AMC | ENCSR000AMC | ENCSR000AKT | ENCSR875KOJ | ENCSR791INM |
| H3K4me3 | ENCSR057BWO | ENCSR814XPE | ENCSR333OPW | ENCSR575RRX | ENCSR575RRX | ENCSR668LDD | ENCSR985MIB | ENCSR975GZA |
| H3K9ac | ENCSR000AKH | ENCSR952GVX | ENCSR093SHE | ENCSR000AMD | ENCSR000AMD | ENCSR000EVZ | ENCSR056UBA | ENCSR121INC |
| H3K9me3 | ENCSR000AOX | ENCSR000APZ | ENCSR179BUC | ENCSR000ATD | ENCSR000ATD | ENCSR000APE | ENCSR999WHE | ENCSR657OGA |
| H3K27ac | ENCSR000AKC | ENCSR000ANP | ENCSR000EUT | ENCSR000AMO | ENCSR000AMO | ENCSR000AKP | ENCSR000EWR | ENCSR564IGJ |
| H3K27me3 | ENCSR000DRX | ENCSR216OGD | ENCSR810BDB | ENCSR000AOL | ENCSR000AOL | ENCSR000EWB | ENCSR000EWP | ENCSR914QOK |
| H3K36me3 | ENCSR000AKE | ENCSR000ANB | ENCSR091QXP | ENCSR000AMB | ENCSR000AMB | ENCSR000AKR | ENCSR610IYQ | ENCSR978CNH |
| H3K79me2 | ENCSR000AOW | ENCSR000APY | ENCSR494CCN | ENCSR000AOM | ENCSR000AOM | ENCSR000APD | ENCSR059ICA | ENCSR074TRC |
| H4K20me1 | ENCSR000AKI | ENCSR000AMH | ENCSR474DOV | ENCSR000AMQ | ENCSR000AMQ | ENCSR000AKX | ENCSR639RHG | ENCSR878HPJ |
